# Supplementary material for: NTCP Modeling of Late Effects for Head and Neck Cancer: A Systematic Review
Source: PubMed Central journal article supplement (PMC8270107; doi:10.14338/20-00092), 2021-06-25
Supplement: ijpt-08-01-26_s01.pdf [file ijpt-08-01-26_s01.pdf]

## Supplementary Material

**Supplementary Table I: Overview of NTCP models in head and neck cancer patients to predict toxicity  $\geq 6$  months from radiotherapy**

| Author, year Group | Number of patients | Tumor entity                                 | RT technique                      | Endpoint                                                                                            | Model                                                                                                                                            | Variables studied/ included in final model                                                                                                                                                                                                                                                                                                                                                                                                                             | Overall quality                                                                                                                                                                                                                                                                                                                                                                                                                                                                                                                 |
|--------------------|--------------------|----------------------------------------------|-----------------------------------|-----------------------------------------------------------------------------------------------------|--------------------------------------------------------------------------------------------------------------------------------------------------|------------------------------------------------------------------------------------------------------------------------------------------------------------------------------------------------------------------------------------------------------------------------------------------------------------------------------------------------------------------------------------------------------------------------------------------------------------------------|---------------------------------------------------------------------------------------------------------------------------------------------------------------------------------------------------------------------------------------------------------------------------------------------------------------------------------------------------------------------------------------------------------------------------------------------------------------------------------------------------------------------------------|
| <b>Xerostomia</b>  |                    |                                              |                                   |                                                                                                     |                                                                                                                                                  |                                                                                                                                                                                                                                                                                                                                                                                                                                                                        |                                                                                                                                                                                                                                                                                                                                                                                                                                                                                                                                 |
| van Dijk, 2016 [1] | 249                | HNC (L, OP, HP, NP, OC, CUP)                 | 3DCRT (9%), IMRT (87%), VMAT (4%) | Mod./sev. xerostomia and sticky saliva (EORTC QLQ H&N35 two highest scores) at 1y post-RT           | LASSO multivariate logistic regression<br><br>Model parameters (multiple models, see Table 3 of article)                                         | Studied: sex, age, overall stage, TNM stage, tumor site, RT technique, systemic treatment, weight, length, BMI, BL xerostomia, BL sticky saliva, and various imaging variables (n=130)<br><br>Included:<br>Xerostomia: Dmean PG contra, BL xerostomia, SRE GLRLM (Parotid imaging biomarker, unclear if ipsi/contra/both)<br>Sticky saliva: Dmean SMG (unclear if ipsi / contra / both), BL sticky saliva, max HU SMG (Imaging biomarker, unclear if ipsi/contra/both) | Good<br>- Endpoint $\geq 12$ m from RT start: yes<br>- Advanced RT techniques only, no reirradiation: no<br>- N pts. / N events: 249/ 63 (sticky saliva), /100 (xerostomia)<br>- Validation: yes (internal cross validation/bootstrapping)<br>- Prospective toxicity collection: yes<br>- Prediction probability: AUC 76xerostomia with and without imaging biomarker 0.77 and 0.75, sticky saliva with and without imaging biomarker 0.77 and 0.74<br>- Others: Limited added value of imaging biomarkers, difficult to assess |
| Dijkema, 2010 [2]  | 222                | HNC (OP, L, OC, NP, Others, NC, HP, SG, CUP) | IMRT                              | Stimulated parotid flow rate $< 25\%$ of BL flow rate grade 4 (RTOG/EORTC) xerostomia at 1y post-RT | LKB<br><br>TD50=39.9Gy, m=0.40, n=1                                                                                                              | Studied: sex, age, tumor site, overall stage, def. vs. postop. RT, recurrence<br>Dosimetric parameters of parotid mean dose; both glands<br><br>Included: Dmean PG                                                                                                                                                                                                                                                                                                     | Good<br>- Endpoint $\geq 12$ m from RT start: yes<br>- Advanced RT techniques only, no reirradiation: no<br>- N pts. / N events: 222 (384 PGs)/NA<br>- Validation: yes (external, Houweling [3])<br>- Prospective toxicity collection: yes<br>- Prediction probability: NA                                                                                                                                                                                                                                                      |
| Dijkema, 2008 [4]  | 221                | HNC (OP, L, OC, NP, Others, NC, HP, CUP)     | 3DCRT (71%), IMRT (29%)           | Stimulated parotid flow rate $< 25\%$ of BL flow rate at 6w, 6m, 1y post-RT                         | LKB<br><br>1y, RCT: TD50=40 Gy, m=0.46, n=1;<br>1y, IMRT: TD50=38, m=0.33, n=1                                                                   | Studied: Dmean PG (unclear if ipsi, contra or both included)<br><br>Included: Dmean PG (unclear if ipsi, contra or both included)                                                                                                                                                                                                                                                                                                                                      | Fair<br>- Endpoint $\geq 12$ m from RT start: yes<br>- Advanced RT techniques only, no reirradiation: no, but separate analysis for 3DRT and IMRT<br>- N pts. / N events: 221/ 90<br>- Validation: yes (external, Houweling [3])<br>- Prospective toxicity collection: yes<br>- Prediction probability: NA<br>- Others: Unclear if Dmean PG ipsi / contra / both                                                                                                                                                                |
| Beetz, 2012 [5]    | 178                | HNC (OC, OP, L/HP, NP, PNS)                  | IMRT                              | Mod./sev. xerostomia at 6m and sticky saliva after completion of RT                                 | Logistic regression<br><br>NTCP = $(1 + e^{-s})^{-1}$ , where $s = -1.443 + (Dmean PG contra \times 0.047) + (BL xerostomia score \times 0.720)$ | Studied: sex, age, site, T stage, N positivity, bilat. neck RT, chemo, Cetuximab, Dmean PG contra, Dmean SMG contra, Dmean SLG both<br><br>Included: Dmean PG contra, Dmean? SMG contra, BL xerostomia, Dmean                                                                                                                                                                                                                                                          | Good<br>- Endpoint $\geq 12$ m from RT start: no (assessed 6 months)<br>- Advanced RT technioLues only, no reirradiation: yes<br>- N pts. / N events: 178/83<br>- Validation: yes (internal bootstrapping and external, Blanchard [6])<br>- Prospective toxicity collection: yes                                                                                                                                                                                                                                                |

| Author, year Group                                                                 | Number of patients | Tumor entity                          | RT technique                  | Endpoint                                                                          | Model                                                                                                                                                                                                                                                                                                                                    | Variables studied/ included in final model                                                                                                                                                                                                                                | Overall quality                                                                                                                                                                                                                                                                                                                                                                                                                     |
|------------------------------------------------------------------------------------|--------------------|---------------------------------------|-------------------------------|-----------------------------------------------------------------------------------|------------------------------------------------------------------------------------------------------------------------------------------------------------------------------------------------------------------------------------------------------------------------------------------------------------------------------------------|---------------------------------------------------------------------------------------------------------------------------------------------------------------------------------------------------------------------------------------------------------------------------|-------------------------------------------------------------------------------------------------------------------------------------------------------------------------------------------------------------------------------------------------------------------------------------------------------------------------------------------------------------------------------------------------------------------------------------|
|                                                                                    |                    |                                       |                               |                                                                                   |                                                                                                                                                                                                                                                                                                                                          | SLG both, Dmean soft palate                                                                                                                                                                                                                                               | - Prediction probability: yes; AUC 0.68 for xerostomia and AUC 0.70 for sticky saliva (acute tox)                                                                                                                                                                                                                                                                                                                                   |
| Beetz, 2012 [7]<br>(similar to study above but looked at 3DCRT and toxicity at 6m) | 167                | HNC (OP, NP, HP, L, misc)             | 3DCRT                         | Mod/sev xerostomia (EORTC QLQ-HN35) at 6m post-RT                                 | Logistic regression<br><br>NTCP = $(1 + e^{-s})^{-1}$ , where<br>$s = -5.27 + (Dmean PG \times 0.066) + age \times 0.050 + (baseline xerostomia score \times 0.916)$                                                                                                                                                                     | Studied: sex, age, chemo, T stage, N stage, site, bilat neck RT, medical centre<br><br>Included: Dmean PG both, Dmean SMG both, Dmean SLG both                                                                                                                            | Good<br>- Endpoint $\geq 12m$ from RT start: no (assessed 6 months)<br>- Advanced RT techniques only, no reirradiation: no<br>- N pts. / N events: 167/87<br>- Validation: - Validation: yes (internal bootstrapping and external Beetz [8])<br>- Prospective toxicity collection: yes<br>- Prediction probability: AUC 0.82 for xerostomia, AUC 0.84 for sticky saliva                                                             |
| Van Dijk, 2018 [9]                                                                 | 161                | HNC (OP, L, HP, NP, OC)               | IMRT (90%), VMAT (10%)        | Mod./sev. xerostomia (EORTC QLQ H&N 35) at 12m post-RT                            | Lasso logistic regression<br><br>NTCP = $1/(1 + e^{-s})$<br><br>a) Intensity PET IBM:<br>$s = 0.984 + 0.048 \times Dmean PG contra + 1.402 \times BL xerostomia - 1.527 \times P90 PG$<br>b) Textural PET IBM:<br>$s = -2.598 + 0.051 \times Dmean PG contra + 1.479 \times BL xerostomia - 0.880 \times (LRHG3E(PG) - 201.24 / 177.05)$ | Studied: Dmean PG contra, BL xerostomia, 24 intensity PET biomarkers: SUVmean, min, max PG contra, 66 textural features (unclear if ipsi/contra/both)<br><br>Included: BL xerostomia, Dmean PG contra, P90, LRHG3E (both imaging biomarkers, unclear if ipsi/contra/both) | Poor<br>- Endpoint $\geq 12m$ from RT start: yes<br>- Advanced RT techniques only, no reirradiation: yes<br>- N pts. / N events: 161/60<br>- Validation: yes (internal cross validation/bootstrapping)<br>- Prospective toxicity collection: yes<br>- Prediction probability: AUC: a) 0.77, b) 0.77<br>- Others: "Halo" of PET positive level II lymph nodes in PG not accounted for                                                |
| Gabrys, 2017 [10]                                                                  | 153                | HNC (OP, HP/L, NP, Others)            | IMRT (24%), Tomotherapy (76%) | G1+/G2+ xerostomia (mainly CTCAE grading) 6m (+/- 3m), 12m (+/- 3m) post-RT start | LKB<br><br>G1+, 12m, PG contra: TD50=12.0 Gy, m=0.61, n=1; G1+, 12m, PG both: TD50=13.6Gy, m=0.61, n=1;<br>G2+, 12m, PG contra: TD50=51.6Gy, m=0.60, n=1;<br>G2+, 12m, PG both: TD50=64.8Gy, m=0.60, n=1                                                                                                                                 | Studied: Dmean PG contra and both PGs<br><br>Included: Dmean PG contra and both PGs                                                                                                                                                                                       | Good<br>- Endpoint $\geq 12m$ from RT start: yes<br>- Advanced RT techniques only, no reirradiation: yes<br>- N pts. / N events: 153/120 (G1+) and 27 (G2)/138 (6m)<br>- 83 (G1+) and 15 (G2)/102 (12m)<br>- Validation: no<br>- Prospective toxicity collection: no<br>- Prediction probability: AUC G1+ xerostomia: 0.69 – 0.76, G1+ 0.49 – 0.56 (G2+)<br>- Others: Satisfactory model for G1+ only, which might be less relevant |
| Roesink, 2004 AL [11]                                                              | 108                | HNC (larynx, OC, OP, NC, NP, HP, CUP) | 3DCRT                         | Salivary excretion fraction (SEF) of <45% of BL flow at 6w and 1y post-RT         | Lyman<br><br>1y, SEF<25%: TD50=52Gy, m=0.42, n=1;<br>1y, SEF<35%: TD50=47Gy, m=0.48, n=1;<br>1y, SEF<45%: TD50=43Gy, m=0.53, n=1;<br>1y, SEF<55%: TD50=40Gy, m=0.59, n=1;<br>1y, flow ratio<25%: TD50=39Gy, m=0.45, n=1                                                                                                                  | Studied: sex, age, tumor site, T stage, N stage, surgery before RT, Dmean PG both<br><br>Included: salivary excretion fraction (SEF) single PG (unclear which side)                                                                                                       | Fair<br>- Endpoint $\geq 12m$ from RT start: yes<br>- Advanced RT techniques only, no reirradiation: no<br>- N pts. / N events: 1y: 132 glands/93<br>- Validation: yes (external, Houweling [3])<br>- Prospective toxicity collection: yes<br>- Prediction probability: NA<br>- Others: unclear which PG included in model                                                                                                          |
| Lee, 2014 [12]                                                                     | 236                | HNC (NP, OC, OP, HP, L, Others)       | IMRT                          | Mod./sev. Xerostomia (EORTC QLQ H&N35 scores)                                     | LASSO logistic regression<br>NTCP = $(1 + e^{-s})^{-1}$<br><br>HNSSC: 12m, PG ipsi: TD50=38.0 Gy,                                                                                                                                                                                                                                        | Studied: 13 (NPC) – 15 (HNSCC) clinical factors, Dmean PG ipsi and contra                                                                                                                                                                                                 | Good<br>- Endpoint $\geq 12m$ from RT start: yes<br>- Advanced RT techniques only, no reirradiation: yes<br>- N pts. / N events: 12m: 143 / 52                                                                                                                                                                                                                                                                                      |

| Author, year Group | Number of patients | Tumor entity                             | RT technique | Endpoint                                                                                                             | Model                                                                                                                                                                                                                                                                                                                                                                                          | Variables studied/ included in final model                                                                                                                                                                                                                                                                                                         | Overall quality                                                                                                                                                                                                                                                                                                                                                                                                                                                                                                 |
|--------------------|--------------------|------------------------------------------|--------------|----------------------------------------------------------------------------------------------------------------------|------------------------------------------------------------------------------------------------------------------------------------------------------------------------------------------------------------------------------------------------------------------------------------------------------------------------------------------------------------------------------------------------|----------------------------------------------------------------------------------------------------------------------------------------------------------------------------------------------------------------------------------------------------------------------------------------------------------------------------------------------------|-----------------------------------------------------------------------------------------------------------------------------------------------------------------------------------------------------------------------------------------------------------------------------------------------------------------------------------------------------------------------------------------------------------------------------------------------------------------------------------------------------------------|
|                    |                    |                                          |              | 66 – 100) at 3m and 12m post-RT                                                                                      | $y=1.17$ , PG contra: TD50=25.4 Gy, $y=2.41$ ;<br>NPC: 12m, PG ipsi: TD50=42.8 Gy, $y=4.35$ , PG contra: TD50=40.0 Gy, $y=3.96$                                                                                                                                                                                                                                                                | Included (12m):Dmean PG ipsi / contra                                                                                                                                                                                                                                                                                                              | <ul style="list-style-type: none"> <li>- Validation: yes (internal cross validation with bootstrapping)</li> <li>- Prospective toxicity collection: yes</li> <li>- Prediction probability: AUC 12m: 0.98 (HNSCC), 0.96 (NPC)</li> </ul>                                                                                                                                                                                                                                                                         |
| Lee, 2014 [13]     | 206                | HNC (NP, OC, OP, HP, L, Others)          | IMRT         | G3+ xerostomia (EORTC QLQ H&N35 scores 66 - 100) at 3m and 12m post-RT                                               | LASSO logistic regression<br><br>NTCP = $(1 + e^{-s})^{-1}$ , where $s=-12.045+(Dmean\ PG\ ipsi \times 0.176) + (education \times corresponding\ coefficient) + (Dmean\ PG\ contra \times 0.121) + (smoking \times 0.993) + (T\ stage \times corresponding\ coefficient) + (BL\ xerostomia \times 0.898) + (alcohol \times 0.913) + (family\ history \times -0.871) + (N\ stage \times 1.034)$ | Studied: sex, age, T stage, N stage, overall stage, SIB vs. sequential RT, chemo, smoking, alcohol, education, family status, family history, financial status, BL xerostomia, Dmean PG ipsi, Dmean PG contra<br><br>Included: T stage, N stage, chemo, smoking, alcohol, education, family history, BL xerostomia, Dmean PG ipsi, Dmean PG contra | Poor <ul style="list-style-type: none"> <li>- Endpoint <math>\geq 12m</math> from RT start: yes</li> <li>- Advanced RT techniques only, no reirradiation: yes</li> <li>- N pts. / N events: 12m: 128/43</li> <li>- Validation: yes (internal cross validation)</li> <li>- Prospective toxicity collection: yes</li> <li>- Prediction probability: AUC 0.87</li> <li>- Others: uncommon variable selection</li> </ul>                                                                                            |
| Lee, 2012 [14]     | 32                 | HNC (OC, NP, OP, L, PG)                  | IMRT         | Stimulated salivary excretion fraction (SEF) $\leq 45\%$ of BL flow and mod./sev. Xerostomia (EORTC QLQ-H&N35) at 1y | LKB<br><br>1y, SEF: TD50=43.6Gy, $m=0.18$ , $n=1$<br>1y, QoL: TD50=44.1Gy, $m=0.11$ , $n=1$                                                                                                                                                                                                                                                                                                    | Studied: age, tumor site, surgery, chemo, Dmean PG (unclear if ipsi, contra or both)<br><br>Included: Dmean PG (unclear if ipsi, contra or both)                                                                                                                                                                                                   | Poor <ul style="list-style-type: none"> <li>- Endpoint <math>\geq 12m</math> from RT start: yes</li> <li>- Advanced RT techniques only, no reirradiation: yes</li> <li>- N pts. / N events: 12m: 31/5 (SEF), 31/6 (QoL)</li> <li>- Validation: yes (internal)</li> <li>- Prospective toxicity collection: yes</li> <li>- Prediction probability: AUC 0.75 (SEF), 0.75 (QoL), Hosmer-Lemeshow test <math>X^2=10.2</math> (<math>p=0.24</math>, SEF), <math>X^2=7.76</math> (<math>p=0.46</math>, QoL)</li> </ul> |
| Roesink, 2001 [15] | 108                | HNC (L, OC, OP, NC, NP, HP, CUP)         | 3DCRT        | Stimulated parotid flow rate $< 25\%$ of the preRT flow rate at 6w, 6m, 1y post-RT                                   | Lyman<br><br>6m: TD50=35, $m=0.46$ , $n=1$ ;<br>1y: TD50=39, $m=0.45$ , $n=1$                                                                                                                                                                                                                                                                                                                  | Studied: sex, tumor site, T stage, N stage, mean parotid dose<br><br>Included: Dmean single PG (unclear which side)                                                                                                                                                                                                                                | Fair <ul style="list-style-type: none"> <li>- Endpoint <math>\geq 12m</math> from RT start: yes</li> <li>- Advanced RT techniques only, no reirradiation: no</li> <li>- N pts. / N events: 108/66</li> <li>- Validation: yes (external, Houweling [3])</li> <li>- Prospective toxicity collection: yes</li> <li>- Prediction probability: NA</li> <li>- Others: unclear which PG included in the model</li> </ul>                                                                                               |
| Hey, 2009 [16]     | 97                 | HNC (OP, L, OC, NP, Others, NC, HP, CUP) | 3DCRT        | Stimulated parotid flow rate $< 25\%$ of BL flow rate at 4w and 6m post-RT                                           | LKB<br><br>6m, RCT: TD50=32.1 Gy, $m=0.59$ , $n=1$ ;<br>6m, RT: TD50=39.6 Gy, $m=0.33$ , $n=1$                                                                                                                                                                                                                                                                                                 | Studied: Dmean both PGs<br><br>Included: Dmean both PGs                                                                                                                                                                                                                                                                                            | Fair <ul style="list-style-type: none"> <li>- Endpoint <math>\geq 12m</math> from RT start: no</li> <li>- Advanced RT techniques only, no reirradiation: no</li> <li>- N pts. / N events: 97/NA</li> <li>- Validation: no</li> <li>- Prospective toxicity collection: yes</li> <li>- Prediction probability: NA</li> <li>- Others: Dmean of both PGs used as variable</li> </ul>                                                                                                                                |
| Eisbuch, 1999 [17] | 88                 | HNC + skin (OP, SG, OC, skin, HP,        | 3DCRT        | Salivary flow rate $\leq 25\%$ preRT flow at 12m post-RT                                                             | Lyman<br><br>TD50=28.4Gy, $m=0.18$ , $n=1$                                                                                                                                                                                                                                                                                                                                                     | Studied: sex, age, tumor site, overall stage, chemo, surgery preRT, comorbidities, medications, salivary flow rates both glands                                                                                                                                                                                                                    | Fair <ul style="list-style-type: none"> <li>- Endpoint <math>\geq 12m</math> from RT start: yes</li> <li>- Advanced RT techniques only, no reirradiation: no</li> <li>- N pts. / N events: 12m: 96 glands/37</li> </ul>                                                                                                                                                                                                                                                                                         |

| Author, year Group  | Number of patients       | Tumor entity                    | RT technique           | Endpoint                                                                               | Model                                                                                                                                                                                                       | Variables studied/ included in final model                                                                                                                                     | Overall quality                                                                                                                                                                                                                                                                                                                                                                                                         |
|---------------------|--------------------------|---------------------------------|------------------------|----------------------------------------------------------------------------------------|-------------------------------------------------------------------------------------------------------------------------------------------------------------------------------------------------------------|--------------------------------------------------------------------------------------------------------------------------------------------------------------------------------|-------------------------------------------------------------------------------------------------------------------------------------------------------------------------------------------------------------------------------------------------------------------------------------------------------------------------------------------------------------------------------------------------------------------------|
|                     |                          | CUP, L, sinus, glomus)          |                        |                                                                                        |                                                                                                                                                                                                             | Included: Dmean both PGs                                                                                                                                                       | - Validation: yes (external, Houweling [3])<br>- Prospective toxicity collection: no<br>- Prediction probability: NA                                                                                                                                                                                                                                                                                                    |
| Van Dijk, 2018 [18] | 68 (+25 ext. validation) | HNC (OP, L, HP, NP, OC, Others) | IMRT (88%), VMAT (12%) | Mod/sev. xerostomia (EORTC QLQ H&N 35, MSKCC questionnaire) at 12m post-RT             | Logistic regression<br>$NTCP = (1 + e^{-s})^{-1}$ , where $s = -6.09 + Dmean\ SPC \times 0057 + Dmean\ supraglottic\ larynx \times 0.037$                                                                   | Studied: BL xerostomia, Dmean both PGs<br>Intensity and textural MRI biomarkers on T1 (n=64)<br><br>Included: Dmean both PGs, BL xerostomia, P90 (unclear if ipsi/contra/both) | Good<br>- Endpoint $\geq 12m$ from RT start: yes<br>- Advanced RT techniques only, no reirradiation: yes<br>- N pts. / N events: 68 / 34<br>- Validation: yes (internal bootstrapping and external)<br>- Prospective toxicity collection: no<br>- Prediction probability: AUC 0.83<br>- Others: Diff. endpoint for training and test cohort; Dmean to both PGs as variable; unclear if P90 of ipsi, contra, or both PGs |
| Marzi, 2009 [19]    | 59                       | HNC I-IV (NP, OP, HP, OC, CUP)  | IMRT                   | G3+ xerostomia (RTOG) at 3m, 6m, 12m post-RT                                           | LKB and relative seriality (RS) model<br><br>LKB:<br>6m: TD50=27.8Gy, m=0.49, n=1;<br>12m: TD50=41.6Gy, m=0.45, n=1<br><br>RS:<br>6m: TD50=26.3Gy<br>12m: TD50=40.0Gy                                       | Studied: Dmean both PGs<br><br>Included: Dmean both PGs                                                                                                                        | Fair<br>- Endpoint $\geq 12m$ from RT start: yes<br>- Advanced RT techniques only, no reirradiation: yes<br>- N pts. / N events: 59/(3m: 39, 6m: 25, 12m: 10)<br>- Validation: no<br>- Prospective toxicity collection: yes<br>- Prediction probability: AUC at 12m: 0.71 (LKB) and 0.70 (S)<br>- Others: No differentiation ipsi / contra PG                                                                           |
| Lee, 2015 [20]      | 67                       | NP                              | Tomotherapy            | EORTC QLQ HN35 at 6m post-RT                                                           | LASSO logistic regression<br><br>$NTCP = 1/(1 + \exp(-s))$ , where $s = -42.149 + (age \times 0.548) + (Dmean\ oral\ cavity \times 0.500) + (education \times coefficient) + (T\ stage \times coefficient)$ | Studied: 11 clinical and 5 dosimetric parameters<br><br>Included: age, T stage, education, Dmean oral cavity                                                                   | Poor<br>- Endpoint $\geq 12m$ from RT start: no<br>- Advanced RT techniques only, no reirradiation: yes<br>- N pts. / N events: 54/15<br>- Validation: no<br>- Prospective toxicity collection: yes<br>- Prediction probability: AUC 0.95 (overfitting?)                                                                                                                                                                |
| Braam, 2005 [21]    | 52                       | HNC (L, FOM/OC, OP, NC, HP, NP) | 3DCRT                  | Parotid salivary flow rate $\leq 25\%$ preRT flow at 6m, 12m and at least 3.5y post-RT | Lyman<br><br>6m: TD50=40Gy, m=0.33, n=1;<br>12m: TD50=42Gy, m=0.37, n=1;<br>5y: TD50=46Gy, m=0.53, n=1                                                                                                      | Studied: sex, age, tumor site, T stage, N stage, surgery, bilateral parotid glands, stimulated parotid flow rate $< 25\%$ of the preRT flow rate<br><br>Included: Dmean both   | Good<br>- Endpoint $\geq 12m$ from RT start: yes<br>- Advanced RT techniques only, no reirradiation: no<br>- N pts. / N events: 52/NA<br>- Validation: no<br>- Prospective toxicity collection: yes<br>- Prediction probability: NA                                                                                                                                                                                     |
| Miah, 2013 [22]     | 35                       | HNC (OP, HP/L, NP, Others)      | IMRT                   | G2+ xerostomia (LENT SOMA, RTOG and XQ) at 1y post-RT                                  | LKB<br><br>Flow: TD50=26.3Gy m=0.25, n=1;<br>LENT SOMA: TD50=28.7Gy, m=0.20, n=1                                                                                                                            | Studied & included: Dmean PG (unclear if contra or both)                                                                                                                       | Poor<br>- Endpoint $\geq 12m$ from RT start: yes<br>- Advanced RT techniques only, no reirradiation: yes<br>- N pts. / N events: 35/NA<br>- Validation: no<br>- Prospective toxicity collection: yes<br>- Prediction probability: NA                                                                                                                                                                                    |
| Chen, 2013 [23]     | 31                       | HNC (OP,                        | IMRT                   | G3+ salivary flow at 1y and 2y                                                         | LKB                                                                                                                                                                                                         | Studied: age, tumor site, chemo (yes vs. no), surgery, Dmean both PGs                                                                                                          | Poor<br>- Endpoint $\geq 12m$ from RT start: yes                                                                                                                                                                                                                                                                                                                                                                        |

| Author, year Group      | Number of patients | Tumor entity                             | RT technique               | Endpoint                                                                                                       | Model                                                                                                                               | Variables studied/ included in final model                                                                                                                                                          | Overall quality                                                                                                                                                                                                                           |
|-------------------------|--------------------|------------------------------------------|----------------------------|----------------------------------------------------------------------------------------------------------------|-------------------------------------------------------------------------------------------------------------------------------------|-----------------------------------------------------------------------------------------------------------------------------------------------------------------------------------------------------|-------------------------------------------------------------------------------------------------------------------------------------------------------------------------------------------------------------------------------------------|
| (same patients as [14]) |                    | HP/L, NP, Others)                        |                            | post-RT                                                                                                        | 1y: TD50=43.6 Gy, m=0.18, n=1 ;<br>2y: TD50=44.5 Gy, m=0.30, n=1                                                                    | Included: Dmean both PGs                                                                                                                                                                            | - Advanced RT techniques only, no reirradiation: yes<br>- N pts. / N events: 31/NA<br>- Validation: no<br>- Prospective toxicity collection: yes<br>- Prediction probability: R <sup>2</sup> = 0.651 at 1y & 0.310 at 2y                  |
| Scrimger, 2004 [24]     | 23                 | HNC (OC, OP, NP, L/HP)                   | IMRT                       | Stimulated and unstimulated saliva collections every 3m for 2 years post-RT<br>Grade2 xerostomia at 1y post-RT | Lyman<br>Early: TD50=12.4Gy<br>Late: TD50=43.9Gy                                                                                    | Studied: sex, tumor site, overall stage, def. vs. postop. RT, bi- vs. unilateral RT, Dmean both PGs, Dmean both SMGs, threshold D50<br><br>Included: Dmean both parotid                             | Fair<br>- Endpoint >=12m from RT start: yes<br>- Advanced RT techniques only, no reirradiation: yes<br>- N pts. / N events: 23/NA<br>- Validation: no<br>- Prospective toxicity collection: yes<br>- Prediction probability: NA           |
| Tenhunen, 2008 [25]     | 20                 | HNC (OP, HP, L, Others)                  | IMRT                       | Unstimulated and stimulated salivary flow at 6m and 12m post-RT                                                | Lyman<br>Scintigraphically determined dose-response models<br><br>TD50=39Gy for PG and SMG at 6 and 12 months                       | Studied: sex, tumor site, tumor stage, tumor size, regional LN, histology, Dmean individual glands (unclear if ipsi or contra)<br><br>Included: Dmean individual glands (unclear if ipsi or contra) | Fair<br>- Endpoint >=12m from RT start: yes<br>- Advanced RT techniques only, no reirradiation: yes<br>- N pts. / N events: 20/NA<br>- Validation: no<br>- Prospective toxicity collection: yes<br>- Prediction probability: NA           |
| Moiseenko, 2012 [26]    | 66                 | HNC (OC, OP, NP, L/HP)                   | 3DCRT (67%),<br>IMRT (33%) | Parotid salivary flow rate <=25% preRT flow at 3m and 12m post-RT                                              | LKB model<br>3m: TD50=22.2Gy, y=0.83;<br>12m: TD50=32.4Gy, y=0.97                                                                   | Dmean contra parotid                                                                                                                                                                                | Fair<br>- Endpoint >=12m from RT start: yes<br>- Advanced RT techniques only: no<br>- N pts. / N events: 66/21 at 3m and 11 at 12m<br>- Validation: no<br>- Prospective toxicity collection: yes<br>- Prediction probability: NA          |
| Houweling, 2010 [3]     | 347                | HNC (OP, L, OC, NP, Others, NC, HP, CUP) | 3DCRT (45%),<br>IMRT (55%) | Parotid salivary flow rate <=25% preRT flow at 12m post-RT                                                     | LKB model:<br>TD50=39.4 Gy, m=0.42, n=1.13;<br><br>Mean dose model<br>TD50=39.9 Gy, m=0.4, n=1                                      | Dmean contra parotid                                                                                                                                                                                | Good<br>- Endpoint >=12m from RT start: yes<br>- Advanced RT techniques only: no<br>- N pts. / N events: 347/NA at 12m<br>- Validation: no<br>- Prospective toxicity collection: yes<br>- Prediction probability: AUC 0.86 for all models |
| Mavroidis, 2017 [27]    | 32                 | OPC                                      | IMRT                       | PRO-CTCAE at 6m & 12m                                                                                          | LKB at 12m (n=1):<br><br>Contra PG+SMG: TD50=26.9 Gy, m=0.65<br>Contra PG: TD50=21.9 Gy, m=0.78<br>Contra SMG: TD50=47.7 Gy, m=0.70 | Dmean PG, SMG or both                                                                                                                                                                               | Fair<br>- Endpoint >=12m from RT start: yes<br>- Advanced RT techniques only: yes<br>- N pts. / N events: 32/15 at 12m<br>- Validation: no<br>- Prospective toxicity collection: yes<br>- Prediction probability: AUC 0.67-0.73           |
| <b>Dysphagia</b>        |                    |                                          |                            |                                                                                                                |                                                                                                                                     |                                                                                                                                                                                                     |                                                                                                                                                                                                                                           |
| Langendijk, 2009        | 529                | HNC (L, OP, OC,                          | 3DCRT (83%),               | G2+ dysphagia (RTOG/EORTC)                                                                                     | Logistic regression                                                                                                                 | Studied: sex, age, tumor site, T stage, N stage, postop RT, conv. fx, acc. fx,                                                                                                                      | Fair<br>- Endpoint >=12m from RT start:                                                                                                                                                                                                   |

| Author, year Group     | Number of patients    | Tumor entity                         | RT technique                           | Endpoint                                                 | Model                                                                                                                                                                                                                                                                                                                                                                                                                                                                 | Variables studied/ included in final model                                                                                                                                                                                                                                                                                          | Overall quality                                                                                                                                                                                                                                                                                                                                                                                                                                                                 |
|------------------------|-----------------------|--------------------------------------|----------------------------------------|----------------------------------------------------------|-----------------------------------------------------------------------------------------------------------------------------------------------------------------------------------------------------------------------------------------------------------------------------------------------------------------------------------------------------------------------------------------------------------------------------------------------------------------------|-------------------------------------------------------------------------------------------------------------------------------------------------------------------------------------------------------------------------------------------------------------------------------------------------------------------------------------|---------------------------------------------------------------------------------------------------------------------------------------------------------------------------------------------------------------------------------------------------------------------------------------------------------------------------------------------------------------------------------------------------------------------------------------------------------------------------------|
| [28]                   |                       | HP, CUP, NP)                         | IMRT (10%), "Bellinzona technique (6%) | at 6m post-RT                                            | Model parameters: unclear                                                                                                                                                                                                                                                                                                                                                                                                                                             | chemo, RT technique, neck RT, BL dysphagia, BL weight loss<br><br>Included: tumor site, T stage, conv. fx, acc. fx, neck RT, chemo, BL weight loss,                                                                                                                                                                                 | <ul style="list-style-type: none"> <li>- Advanced RT techniques only, no reirradiation: no</li> <li>- N pts. / N events: 529 / 122</li> <li>- Validation: yes (internal)</li> <li>- Prospective toxicity collection: yes</li> <li>- Prediction probability: NA</li> <li>- Others: no dosimetric parameters included as variable; validation on diff. TPs</li> </ul>                                                                                                             |
| Wopken, 2014 [29]      | 427 (+183 validation) | HNC (L, OP, HP, OC, NP)              | 3DCRT (89%), IMRT (11%)                | Feeding tube at 6m post-RT                               | Logistic regression<br><br>NTCP = $1/(1 + \exp(-s))$ , where $s = -3.69 + (T \text{ stage} \times 1.01) + (N \text{ stage} \times 0.87) + (\text{mod. Weight loss} \times 0.82) + (\text{sev. weight loss} \times 1.51) + (\text{bilateral neck RT} \times 0.35) + (\text{acc. RT} \times 0.25) + (\text{chemo} \times 0.41)$                                                                                                                                         | Studied: Sex, age, tumor site, T stage, N stage, conv. vs. acc. fx., chemo, RT technique, BL dysphagia, neck irradiation, BL weight loss<br><br>Included: T stage, N stage, weight loss, neck irradiation, chemo                                                                                                                    | Good <ul style="list-style-type: none"> <li>- Endpoint <math>\geq 12m</math> from RT start: no (but feeding tube 6 months = clinically relevant)</li> <li>- Advanced RT techniques only, no reirradiation: no</li> <li>- N pts. / N events: 427 / 55 (training), 183 / 27 (test)</li> <li>- Validation: no</li> <li>- Prospective toxicity collection: yes</li> <li>- Prediction probability: AUC 0.86 (training), 0.82 (test)</li> </ul>                                       |
| Wopken, 2014 [30]      | 355                   | HNC (OC, OP, HP/L, NP, Others)       | IMRT                                   | Feeding tube at 6m post-RT                               | Logistic regression<br><br>NTCP = $1/(1 + \exp(-s))$ , where $s = -11.70 + (\text{advanced T stage} \times 0.43) + (\text{mod. weight loss} \times 0.95) + (\text{sev. weight loss} \times 1.63) + (\text{acc. RT} \times 1.20) + (\text{RCT} \times 1.91) + (\text{RT plus cetuximab} \times 0.56) + (\text{Dmean SPC} \times 0.071) + (\text{Dmean IPC} \times 0.034) + (\text{Dmean PG contra} \times 0.006) + (\text{Dmean cricopharyngeal muscle} \times 0.023)$ | Studied: many clinical (n=X) and dosimetric variables (n=Y), see article, table 2<br><br>Included: T stage, weight loss, acc. RT, chemo, Cetuximab, Dmean IPC, Dmean SPC, Dmean PG contra, Dmean cricopharyngeal muscle                                                                                                             | Good <ul style="list-style-type: none"> <li>- Endpoint <math>\geq 12m</math> from RT start: no (but feeding tube 6 months = clinically relevant)</li> <li>- Advanced RT techniques only, no reirradiation: yes</li> <li>- N pts. / N events: 355/38</li> <li>- Validation: yes (internal cross validation and external, Blanchard [6], Kanayama [31])</li> <li>- Prospective toxicity collection: yes</li> <li>- Prediction probability: AUC 0,88 (cross validation)</li> </ul> |
| Christianen, 2012 [32] | 354                   | HNC (L, OP, OC, HP, NP, CUP, Others) | 3DCRT (62%), IMRT (38%)                | G2-4 dysphagia (RTOG/EORTC) at 6m post-RT                | Logistic regression<br><br>NTCP = $(1 + e^{-s})^{-1}$ , where $s = -6.09 + (\text{Dmean SPC} \times 0.057) + (\text{Dmean supraglottic larynx})$<br><br>Other models for secondary endpoints: Problems swallowing liquids / soft foods / solid foods, and choking when swallowing                                                                                                                                                                                     | Studied: Sex, age, tumor site, T stage, N stage, conc. Chemo, RT technique, acc. RT, bilateral neck RT, BL dysphagia, Dmean SPC, MPC, IPC, cricopharyngeus, cerv. Esophagus, BOT, supraglottic and glottis larynx, PG both, SMG both, Deman, V50, V60 esophageal inlet muscle<br><br>Included: Dmean SPC, Dmean supraglottic larynx | Good <ul style="list-style-type: none"> <li>- Endpoint <math>\geq 12m</math> from RT start: no</li> <li>- Advanced RT techniques only, no reirradiation: no</li> <li>- N pts. / N events: 354/ NA</li> <li>- Validation: yes (external, Blanchard [6], Hansen [33], Christianen [34])</li> <li>- Prospective toxicity collection: yes</li> <li>- Prediction probability: AUC 0,80</li> </ul>                                                                                    |
| Tsai, 2017 [35]        | 424                   | HNC (OPC, NPC, L, HP, Others)        | IMRT                                   | G2+/G3+ dysphagia (CTCAE) 6 – 69m (median 33.2m) post-RT | Logistic regression<br><br>Model parameters: unclear                                                                                                                                                                                                                                                                                                                                                                                                                  | Studied: sex, age, tumor site, T stage, N stage, KPS, BL dysphagia, low ant. Neck fields, gEUD(a) values for SPC, MPC, IPC, total PC volume, larynx                                                                                                                                                                                 | Fair <ul style="list-style-type: none"> <li>- Endpoint <math>\geq 12m</math> from RT start: no</li> <li>- Advanced RT techniques only, no reirradiation: yes</li> <li>- N pts. / N events: 424/41 (G2+)/22(G3+)</li> <li>- Validation: no</li> <li>- Prospective toxicity collection: no</li> <li>- Prediction probability: NA</li> <li>- Others: only pts. without prior surgery and without local</li> </ul>                                                                  |

| Author, year Group                  | Number of patients | Tumor entity              | RT technique | Endpoint                                                                                              | Model                                                                                                                                                                                                                                           | Variables studied/ included in final model                                                                                                                                    | Overall quality                                                                                                                                                                                                                                                                                           |
|-------------------------------------|--------------------|---------------------------|--------------|-------------------------------------------------------------------------------------------------------|-------------------------------------------------------------------------------------------------------------------------------------------------------------------------------------------------------------------------------------------------|-------------------------------------------------------------------------------------------------------------------------------------------------------------------------------|-----------------------------------------------------------------------------------------------------------------------------------------------------------------------------------------------------------------------------------------------------------------------------------------------------------|
|                                     |                    |                           |              |                                                                                                       |                                                                                                                                                                                                                                                 |                                                                                                                                                                               | failures included                                                                                                                                                                                                                                                                                         |
| Mavroidis, 2017 [27]                | 32                 | OPC                       | IMRT         | PRO-CTCAE at 6m                                                                                       | LKB<br>CPC: TD50=67.2 Gy, m=0.10, n=0.01<br>SPC: TD50=62.0 Gy, m=0.10, n=0.49                                                                                                                                                                   | Studied: Dmean CPC or SPC<br><br>Included: Dmean CPC or SPC                                                                                                                   | Fair<br>- Endpoint >=12m from RT start: no<br>- Advanced RT techniques only: yes<br>- N pts. / N events: 32/6<br>- Validation: no<br>- Prospective toxicity collection: yes<br>- Prediction probability: AUC 0.68-0.74                                                                                    |
| <b>Esophageal stricture</b>         |                    |                           |              |                                                                                                       |                                                                                                                                                                                                                                                 |                                                                                                                                                                               |                                                                                                                                                                                                                                                                                                           |
| Mavroidis, 2003 [36]                | 26 + 56 controls   | L, OC, OP, NP, HP, Others | 3DCRT        | Clinical and any grade of endoscopic esophageal stricture 1 – 40m (median 7m) post-RT, Q for controls | Relative seriality model<br><br>TD50= 68.4Gy, y=6.55, s=0.22                                                                                                                                                                                    | Studied: Dmean, Dmax. Esophagus prox. 5cm<br><br>Included: unclear                                                                                                            | Low<br>- Endpoint >=12m from RT start: no<br>- Advanced RT techniques only, no reirradiation: no<br>- N pts. / N events: 82 / 26<br>- Validation: no<br>- Prospective toxicity collection: no<br>- Prediction probability: ROC = 0.84, X <sup>2</sup> test =0.95<br>- Others: FU of control group unclear |
| <b>Dysgeusia</b>                    |                    |                           |              |                                                                                                       |                                                                                                                                                                                                                                                 |                                                                                                                                                                               |                                                                                                                                                                                                                                                                                                           |
| Sapir, 2016 [37]                    | 73                 | OP III-IV (90% HPV+)      | IMRT         | Severe dysgeusia (UWQOL and HNQOL questionnaire, score >50/100) at 3m post-RT                         | LKB<br><br>HNQOL: D50 = 53 Gy, m=0.4, n=unclear;<br>UWQOL: D50 = 57 Gy, m=0.4, n=unclear (m value extracted from Fig 1 in manuscript)                                                                                                           | Studied: Dmean oral cavity, anterior tongue, Dmean BOT, pretreatment taste function, time after treatment, age, sex<br><br>Included: Dmean oral cavity                        | Fair<br>- Endpoint >=12m from RT start: no<br>- Advanced RT techniques only, no reirradiation: yes<br>- N pts. / N events: 73/26<br>- Validation: no<br>- Prospective toxicity collection: yes<br>- Prediction probability: NA<br>- Others: Oral cavity as OAR                                            |
| <b>Brain necrosis / Nerve palsy</b> |                    |                           |              |                                                                                                       |                                                                                                                                                                                                                                                 |                                                                                                                                                                               |                                                                                                                                                                                                                                                                                                           |
| Wang, 2019 [38]                     | 749                | NP I-IV                   | IMRT         | G1+ temporal lobe necrosis on MRI 3.5– 75m* (median 49m) post-RT                                      | Lasso binary regression<br><br>NTCP = $1/(1 + \exp(7.36 - 0.00036 D_{0.5cc} - 0.00054 D_{10}))$<br>( $D_{0.5cc}/D_{10}$ in cGy)                                                                                                                 | Studied: sex, age, T stage, N stage, overall stage, diabetes, hypertension, Dmax, Dmin, Dmean, further DVH variables<br><br>Included: D0.5cc and D10 selected for final model | Good<br>- Endpoint >=12m from RT start: no<br>- Advanced RT techniques only, no reirradiation: yes<br>- N pts. / N events: 749/38<br>- Validation: yes (internal cross validation)<br>- Prospective toxicity collection: no<br>- Prediction probability: AUC 0.68 (testing set)                           |
| Zeng, 2015 [39]                     | 351                | NP I-IV                   | IMRT         | G1+ temporal lobe necrosis on MRI 6 – 100m* (median 76m)                                              | Logistic regression<br><br>$P(X) = (e^{(b0 + b1) \times x}) / (1 + e^{(b0 + b1) \times x})$ ,<br>“where X is the independent dose or volume variable”, and “the mode parameters b0 and b1 were determined by max. likelihood-fitting procedure” | Studied: sex, age, T stage, conc. chemo, DVH variables (n=16)<br><br>Included: D1cc                                                                                           | Fair<br>- Endpoint >=12m from RT start: no<br>- Advanced RT techniques only, no reirradiation: yes<br>- N pts. / N events: 351/29<br>- Validation: no<br>- Prospective toxicity collection: no<br>- Prediction probability: NA                                                                            |

| Author, year Group  | Number of patients | Tumor entity                                                                 | RT technique                      | Endpoint                                                                                                                      | Model                                                                                                                                                                                                                                             | Variables studied/ included in final model                                                                                                                                                                                  | Overall quality                                                                                                                                                                                                                                                                                                                    |
|---------------------|--------------------|------------------------------------------------------------------------------|-----------------------------------|-------------------------------------------------------------------------------------------------------------------------------|---------------------------------------------------------------------------------------------------------------------------------------------------------------------------------------------------------------------------------------------------|-----------------------------------------------------------------------------------------------------------------------------------------------------------------------------------------------------------------------------|------------------------------------------------------------------------------------------------------------------------------------------------------------------------------------------------------------------------------------------------------------------------------------------------------------------------------------|
|                     |                    |                                                                              |                                   |                                                                                                                               | 5y: TD50=77.6 Gy                                                                                                                                                                                                                                  |                                                                                                                                                                                                                             |                                                                                                                                                                                                                                                                                                                                    |
| Niyazi, 2020 [40]   | 179                | HNC, skull base, intracranial tumors with min. dose brain/dura of 59.4Gy RBE | PSPT                              | G2+ brain necrosis ("symptomatic new enhancement with classical imaging features") after min. 0.5-13.0y (median 4.4y) post-RT | Logistic regression and Mixture cure model<br><br>a=9, y50=2.5, EUD50=57.7 Gy for intracranial tumors, EUD50 = 39.5 Gy for extracranial tumors, scale $\lambda=0.38$ , shape $y=1.37$                                                             | Studied: sex, age, conc. chemo, surgery, set of EUD indices, CTV volume, brain-GTV volume, Dmean and Dmax to brain-GTV volume<br><br>Included: tumor origin, EUD indices                                                    | Fair<br>- Endpoint $\geq 12m$ from RT start: no<br>- Advanced RT techniques only, no reirradiation: yes<br>- N pts. / N events: 179/37<br>- Validation: no<br>- Prospective toxicity collection: no<br>- Prediction probability: NA                                                                                                |
| Chow, 2019 [41]     | 165                | NPC T1-4 N0-3                                                                | IMRT                              | Hypoglossal nerve palsy (clinical) after min. FU 6m (median 8.1y) post-RT                                                     | Logistic regression<br><br>Model parameters: unclear                                                                                                                                                                                              | Studied: sex, age, T stage, N stage, hypoglossal canal involvement, chemo, smoking, hypertension, DM, hyperlipidaemia, connective tissue disease, T dose $>70Gy$ , Dmax, D0.5cc, D1cc, D2cc, Dmean<br><br>Included: D1cc    | Fair<br>- Endpoint $\geq 12m$ from RT start: no<br>- Advanced RT techniques only, no reirradiation: yes<br>- N nerves / N events: 330/46<br>- Validation: no<br>- Prospective toxicity collection: no<br>- Prediction probability: AUC 0.83<br>- Others: all pts. min. FU 6m; healthy control min. 8y (false high rate of palsies) |
| Engeseth, 2020 [42] | 127                | HNC+Others T1-4 (NP, sinonasal, orbital, PG, skin, Others)                   | PT (IMPT, PSPT)                   | Radiation-associated MRI changes (RAIC) (T1 CE +/- T2 hyperintensity) after 6 – 97m (median 29) post-RT                       | Recursive partitioning analysis                                                                                                                                                                                                                   | Studied: Age, tumor site, T3-4, PT technique, prescribed dose, ind. chemo, conc. chemo, surgery, Dmax, D0.5cc, D1cc - D5cc in 1cc steps, V40- 70Gy(RBE) in 1Gy(RBE) steps<br><br>Included: V67Gy(RBE)                       | Fair<br>- Endpoint $\geq 12m$ from RT start: no<br>- Advanced RT techniques only, no reirradiation: yes<br>- N pts. / N events: 127/22<br>- Validation: no<br>- Prospective toxicity collection: no<br>- Prediction probability: NA                                                                                                |
| McDonald, 2015 [43] | 66                 | Skull base C/CS, ACC, sinonasal                                              | PT                                | Temporal lobe necrosis at 6 – 96m (median 31m)                                                                                | EC50 model<br><br>$Y = TOP / (1 + 10^{((\log EC50 - X) \times Hillslope)})$ , where "TOP is the maximal risk, Hillslope the steepness of the curve, and logEC50 the irradiated temporal lobe volume in which 50% of the maximal risk is observed" | Studied: sex, age, tumor location, chemo, DM, hypertension, smoking, treatment related data, dose volume data<br><br>Included: V40 / V50 / V60 / V70                                                                        | Fair<br>- Endpoint $\geq 12m$ from RT start: no<br>- Advanced RT techniques only, no reirradiation: yes<br>- N temporal lobes / N events: 131 temporal lobes/12<br>- Validation: no<br>- Prospective toxicity collection: no<br>- Prediction probability: no                                                                       |
| <b>Trismus</b>      |                    |                                                                              |                                   |                                                                                                                               |                                                                                                                                                                                                                                                   |                                                                                                                                                                                                                             |                                                                                                                                                                                                                                                                                                                                    |
| Morimoto, 2019 [44] | 132                | HNC I-IV (L, OP, HP, OC, NP)                                                 | 3DCRT, IMRT (percent age unclear) | Mouth-opening $\leq 35mm$ post RT or $\leq 80\%$ of BL at 6m post-RT                                                          | Logistic regression<br><br>$NTCP = (1 + s^{1-s})^{-1}$ , where $s = 0.494 + Dmean \text{ TMJ contra} \times 0.061 + (BL \text{ mouth opening} \times (-0.006))$                                                                                   | Studied (univariate): sex, age, tumor site, T stage, N stage, overall stage, histology, RT technique (conv. vs. acc.), uni/bilateral neck RT, chemo, max. inter-cicisial opening at BL, Dmean medial pterygoid muscle ipsi, | Good<br>- Endpoint $\geq 12m$ from RT start: no<br>- Advanced RT techniques only, no reirradiation: no<br>- N pts. / N events: 132/30<br>- Validation: no<br>- Prospective toxicity collection: yes                                                                                                                                |



| Author, year Group     | Number of patients | Tumor entity                                                      | RT technique            | Endpoint                                                                                                                                                                             | Model                                                                                                                                                                      | Variables studied/ included in final model                                                                                                                                                                                                                            | Overall quality                                                                                                                                                                                                                                                                                                                                                                                                                                                        |
|------------------------|--------------------|-------------------------------------------------------------------|-------------------------|--------------------------------------------------------------------------------------------------------------------------------------------------------------------------------------|----------------------------------------------------------------------------------------------------------------------------------------------------------------------------|-----------------------------------------------------------------------------------------------------------------------------------------------------------------------------------------------------------------------------------------------------------------------|------------------------------------------------------------------------------------------------------------------------------------------------------------------------------------------------------------------------------------------------------------------------------------------------------------------------------------------------------------------------------------------------------------------------------------------------------------------------|
|                        |                    |                                                                   |                         |                                                                                                                                                                                      |                                                                                                                                                                            | Dmean MM contra, Dmean TMJ contra<br><br>Included: Dmean TMJ contra, max. intercisial opening at BL                                                                                                                                                                   | - Prediction probability: p=0.182 (Hosmer and Lemeshow test)<br>- Others: collinearity check; acc. fx in 95 pts.                                                                                                                                                                                                                                                                                                                                                       |
| Lindblom, 2014 [45]    | 121                | HNC I-IV (OP, OC, L, HP)                                          | 3DCRT (95%), IMRT (5%)  | Maximal interincisal distance (MID) <35mm after 21-127m (median 66 m) post RT-start and problems mouth-opening (EORTC H&N35 QoL scores of 3-4) at several TPs until 5y post RT-start | Logistic regression<br><br>NTCP = $1 / (1 + e^{4y(1 - D/D50)})$<br><br>Model parameters for masseter:<br>MID: TD50=72.3 Gy, y50=1.04<br>QoL scores: TD50=57.2 Gy, y50=0.78 | Studied: Dmean masseter, medial and lateral pterygoid muscles, TMJ (ipsi, contra and both) above mentioned mastication muscles as single structure (ipsi and contra)<br><br>Included: Models for all variables studies; best fit for ipsi masseter for both endpoints | Good<br>- Endpoint >=12m from RT start: yes for MID, unclear for QoL scores<br>- Advanced RT techniques only, no reirradiation: no<br>- N pts. / N events: 121/50<br>- Validation: yes (internal cross validation)<br>- Prospective toxicity collection: no for interincisal distance, yes for QoL<br>- Prediction probability: 0.77 and 0.73 for model with endpoint MID and QoL score 3+, respectively and ipsi masseter included;<br>- Others: 70 pts. with acc. fx |
| <b>Hypothyroidism</b>  |                    |                                                                   |                         |                                                                                                                                                                                      |                                                                                                                                                                            |                                                                                                                                                                                                                                                                       |                                                                                                                                                                                                                                                                                                                                                                                                                                                                        |
| Ronjom, 2013 [46]      | 203                | HNC (OC, OP, HP/L, NP, Others)                                    | IMRT                    | TSH >4 mIU/mL at 1y and 2y post-RT                                                                                                                                                   | Logistic regression<br><br>NTCP = $(1 + e^{-s})^{-1}$ , where $s = -2.019 + 0.0821 \times \text{Dmean TG} - 0.189 \times \text{V TG}$                                      | Studied: age, sex, tumor site, stage, conc. chemo, boost technique, neck dissection after RT, BL TSH, Dmean TD, V TG<br><br>Included: Dmean TG, V TG                                                                                                                  | Good<br>- Endpoint >=12m from RT start: yes<br>- Advanced RT techniques only, no reirradiation: yes<br>- N pts. / N events: 203/35<br>- Validation: yes (external, Nowicka [47], Ronjom [48])<br>- Prospective toxicity collection: no (but objective criterion)<br>- Prediction probability: NA                                                                                                                                                                       |
| Boomsma, 2012 [49]     | 105                | HNC + skin + sarcoma (L, OP, OC, HP, SG, skin, CUP, PNS, sarcoma) | 3DCRT (67%), IMRT (33%) | TSH >4mE/l and/or T4 <11pmol/l in first 2 years; median FU 2.5y (range 0.33-3.30y) post-RT                                                                                           | Logistic regression<br><br>NTCP = $(1 + e^{-s})^{-1}$ , where $s = 0.011 + (0.062 \times \text{Dmean TG}) + (-0.19 \times \text{V TG})$                                    | Studied: sex, age, DM, conv. vs. acc. RT, RT technique, systemic therapy (chemo, Cetuximab), neck surgery, Dmean TG, Dmin. TG, Dmax TG, V20 - V60 TG, V TG<br><br>Included: Dmean TG, V TG                                                                            | Good<br>- Endpoint >=12m from RT start: no<br>- Advanced RT techniques only, no reirradiation: no<br>- N pts. / N events: 105/35<br>- Validation: yes (internal bootstrapping, external, Blanchard [6], Nowicka [47], Kamal [50])<br>- Prospective toxicity collection: yes<br>- Prediction probability: AUC 0.85                                                                                                                                                      |
| Bakhshandeh, 2012 [51] | 65                 | HNC (NP, OC, L, Others) with baseline normal thyroid blood tests  | 3DCRT                   | G1 hypothyroidism at 1y post-RT                                                                                                                                                      | Lyman, Logit, and Mean dose<br><br>Lyman:<br>TD50=44.3 Gy, m=0.25, n=0.92<br><br>Logit EUD:<br>TD50=43.9 Gy, K=6.16, n=0.85                                                | Studied: sex, age, tumor site, chemo, surgery, Dmean TG, Dmean pituitary, V TG<br><br>Included: Dmean pituitary                                                                                                                                                       | Good<br>- Endpoint >=12m from RT start: yes<br>- Advanced RT techniques only, no reirradiation: no<br>- N pts. / N events: 65/29<br>- Validation: yes (external, Nowicka [47])<br>- Prospective toxicity collection: yes<br>- Prediction probability: yes<br>- Others: no satisfactory external validation                                                                                                                                                             |

| Author, year Group  | Number of patients | Tumor entity                                  | RT technique | Endpoint                                                                                  | Model                                                                                                                                                                                                                                                                                                                                                                                                                                                                                                                                                                                                                                                        | Variables studied/ included in final model                                                                | Overall quality                                                                                                                                                                                                                                                                                                                                                                                                                 |
|---------------------|--------------------|-----------------------------------------------|--------------|-------------------------------------------------------------------------------------------|--------------------------------------------------------------------------------------------------------------------------------------------------------------------------------------------------------------------------------------------------------------------------------------------------------------------------------------------------------------------------------------------------------------------------------------------------------------------------------------------------------------------------------------------------------------------------------------------------------------------------------------------------------------|-----------------------------------------------------------------------------------------------------------|---------------------------------------------------------------------------------------------------------------------------------------------------------------------------------------------------------------------------------------------------------------------------------------------------------------------------------------------------------------------------------------------------------------------------------|
| <b>Hearing loss</b> |                    |                                               |              |                                                                                           |                                                                                                                                                                                                                                                                                                                                                                                                                                                                                                                                                                                                                                                              |                                                                                                           |                                                                                                                                                                                                                                                                                                                                                                                                                                 |
| Cheraghi, 2017 [52] | 35                 | HNC (PG, Sinus, NC, SG, Mandible, NP, others) | 3DCRT        | CTCAE v4.03 G1+ sensorial hearing loss relative to BL (pure tone audiometry) (TP unclear) | <p>LEUD, Logit, Relative seriality (RS) model, critical volume model, and mean dose model</p> <p>LEUD :<br/>TD50 52.8, m=0.11, n=0.99</p> <p>Logit :<br/>TD50=50.4, k=10, n=0.09</p> <p>Relative Seriality (RS) model:<br/>TD50=52.7, y=0.68, s=0.85</p> <p>Population critical volume model:<br/><math>\alpha=0.02</math>, <math>\lambda=0.02</math>, <math>N_0=11</math>, <math>N_{FSU}=320</math>, <math>D_S=108</math>, <math>M=0.009</math></p> <p>Individual critical volume model:<br/><math>\gamma_{50}=10</math>, <math>\mu_{er}=0.004</math>, <math>D_{50}=60</math>, <math>\delta=1.10</math></p> <p>Mean dose model:<br/>TD50=51.7Gy, m=0.14</p> | <p>Studied: sex, age, Dmean cochlea, V cochlea (unclear if ipsi/contra/both)</p> <p>Included: unclear</p> | <p>Poor</p> <ul style="list-style-type: none"> <li>- Endpoint <math>\geq 12m</math> from RT start: unclear</li> <li>- Advanced RT techniques only, no reirradiation: no</li> <li>- N ears / N events: 70/9</li> <li>- Validation: no</li> <li>- Prospective study: no</li> <li>- Prediction probability: AIC a) 44.56, b) 45.87, c) 43.09, d) 50.31, e) 48.54, f) 44.64</li> </ul>                                              |
| De Marzi, 2015 [53] | 140                | Skull base CS/C                               | PT           | Hearing loss >15 dB at two contiguous test frequencies >6mo post-RT                       | <p>LKB (gEUD)<br/>Inner ear</p> <p>TD50=53.7 Gy, y=2.8, a=0.1</p>                                                                                                                                                                                                                                                                                                                                                                                                                                                                                                                                                                                            | <p>Studied: Dmean inner ear</p> <p>Included: Dmean inner ear</p>                                          | <p>Fair</p> <ul style="list-style-type: none"> <li>- Endpoint <math>\geq 12m</math> from RT start: yes (median FU 26 months)</li> <li>- Advanced RT techniques only: yes</li> <li>- N ears/ N events: 280/73</li> <li>- Validation: no</li> <li>- Prospective toxicity collection: yes</li> <li>- Prediction probability: AUC 0.86</li> </ul>                                                                                   |
| <b>Tinnitus</b>     |                    |                                               |              |                                                                                           |                                                                                                                                                                                                                                                                                                                                                                                                                                                                                                                                                                                                                                                              |                                                                                                           |                                                                                                                                                                                                                                                                                                                                                                                                                                 |
| Lee, 2015 [54]      | 211                | HNC (NP, OC, HP, OP, L)                       | IMRT         | G2+ tinnitus (LENT-SOMA) between 36 – 77m post-RT                                         | <p>LKB and Logistic regression</p> <p>NTCP = <math>\exp(4y_{50} \times (MD/TD50 - 1))/1 + \exp(4y_{50} \times (MD / TD50 - 1))</math>, where "MD is the mean dose to the cochlea" and "y<sub>50</sub> is the normalized slope of the dose-response curve"</p> <p>LKB:<br/>TD50=46.52Gy, m=0.35</p> <p>Logistic:</p>                                                                                                                                                                                                                                                                                                                                          | <p>Studied: Dmean cochlea ipsi</p> <p>Included: Dmean cochlea ipsi</p>                                    | <p>Fair</p> <ul style="list-style-type: none"> <li>- Endpoint <math>\geq 12m</math> from RT start: yes</li> <li>- Advanced RT techniques only, no reirradiation: yes</li> <li>- N inner ears / N events: 422/49</li> <li>- Validation: no</li> <li>- Prospective toxicity collection: no</li> <li>- Prediction probability: LKB: 0.76, Logistic: 0.76</li> <li>- Others: influence of chemotherapy not accounted for</li> </ul> |

| Author, year Group     | Number of patients | Tumor entity                             | RT technique     | Endpoint                                                                         | Model                                                                                                                                                 | Variables studied/ included in final model                                                                                                         | Overall quality                                                                                                                                                                                                                                               |
|------------------------|--------------------|------------------------------------------|------------------|----------------------------------------------------------------------------------|-------------------------------------------------------------------------------------------------------------------------------------------------------|----------------------------------------------------------------------------------------------------------------------------------------------------|---------------------------------------------------------------------------------------------------------------------------------------------------------------------------------------------------------------------------------------------------------------|
|                        |                    |                                          |                  |                                                                                  | TD50=46.31 Gy, $y_{50}=1.27$                                                                                                                          |                                                                                                                                                    |                                                                                                                                                                                                                                                               |
| <b>Dry eye</b>         |                    |                                          |                  |                                                                                  |                                                                                                                                                       |                                                                                                                                                    |                                                                                                                                                                                                                                                               |
| Bhandare, 2012 [55]    | 78                 | HNC + skin (orbita, sinonasal, NC, skin) | EBRT 1996 - 2000 | Severe dry eye syndrome (RTOG G3/4 and/or G2/3 CTCAE) after mean of 0.9y post-RT | Logistic regression<br>NTCP = $1 / (1 + \exp[-4y_{50}(D/D_{50} - 1)])$<br>$y_{50}$ : normalized slope at D50<br><br>QD: TD50=45 Gy<br>BID: TD50=50 Gy | Studied: sex, age, Dmax lacrimal gland, normal vs. hyperfractionation, dose per fx, chemo, dosimetric factors<br><br>Included: Dmax lacrimal gland | Fair<br>- Endpoint $\geq 12m$ from RT start: no<br>- Advanced RT techniques only, no reirradiation: no<br>- N pts. / N events: 78/40<br>- Validation: yes (internal bootstrapping)<br>- Prospective toxicity collection: no<br>- Prediction probability: NA   |
| <b>Laryngeal edema</b> |                    |                                          |                  |                                                                                  |                                                                                                                                                       |                                                                                                                                                    |                                                                                                                                                                                                                                                               |
| Rancati, 2009 [56]     | 48                 | HNC (OP, CUP, NP)                        | IMRT             | G2+ laryngeal edema (fiberoptic examination) at 15m post-RT                      | Lyman and Logit<br><br>Lyman:<br>TD50=47.3 Gy, m=0.23, n=1.17<br><br>Logit:<br>TD50=46.7Gy, k=7.2 Gy, n=1.41                                          | Studied: dose fractionation, cumulative DVH without edema, cumulative DVH with edema<br><br>Included: Dmean larynx                                 | Fair<br>- Endpoint $\geq 12m$ from RT start: yes<br>- Advanced RT techniques only, no reirradiation: yes<br>- N pts. / N events: 48/25<br>- Validation: no<br>- Prospective toxicity collection: no (but objective criterion)<br>- Prediction probability: NA |
| <b>Hypopituitarism</b> |                    |                                          |                  |                                                                                  |                                                                                                                                                       |                                                                                                                                                    |                                                                                                                                                                                                                                                               |
| De Marzi, 2015 [53]    | 103                | Skull base CS/C                          | PT               | Endocrine test outside normal value (dosage every 6m)                            | LKB (gEUD)<br><br>TD50=60.6, $y=4.9$ , $a=6.4$                                                                                                        | Studied: Dmean pituitary gland<br><br>Included: Dmean pituitary gland                                                                              | Fair<br>- Endpoint $\geq 12m$ from RT start: yes (median FU 26m)<br>- Advanced RT techniques only: yes<br>- N inner ears/ N events: 103/45<br>- Validation: no<br>- Prospective toxicity collection: yes<br>- Prediction probability: AUC 0.86                |

**Abbreviations** (in alphabetical order): 3DCRT: 3d conventional radiotherapy, acc.: accelerated, ACC: adenoid cystic carcinoma, AUC: area under the curve, BID: twice-a-day, BL: baseline, C: chondroma, contra: contralateral, CK: cyberknife, conv.: conventional, CPC: combined pharyngeal muscle (i.e. IPC+MPC+SPC), CS: chondrosarcoma, CUP: cancer of unknown primacy, DM: diabetes mellitus, Dmean: mean dose, DVH: dose volume histogram, EBRT: external beam radiotherapy, fx: fraction, G: grade, HNC: head neck cancer, HP: hypopharynx, IMPT: intensity modulated proton therapy, IMRT: intensity modulated radiotherapy, IPC: inferior pharyngeal constrictor, ipsi: ipsilateral, L: larynx, LKB: Lyman Kutcher Burman, m: month(s), MID: maximal intercisial distance, mod.: moderate, N: number, NA: not assessed, NC: nasal cavity, NP: nasopharynx, N stage: nodal stage, OC: oral cavity, OP: oropharynx, pts.: patients, PET IBM: positron emission tomography imaging biomarker, PG: parotid gland, prev.: previous, PSPT: pencil beam scanned proton therapy, PT: proton therapy, QD: once-a-day, QoL: quality of life questionnaire, RCT: radiochemotherapy, RT: radiotherapy, SBRT: stereotactic radiotherapy, sev.: severe, SMG: submandibular gland, SPC: superior pharyngeal muscle, T: tumor, TD50: dose predicting 50% risk of complication, TG: thyroid gland, TMJ: temporomandibular joint, TP: time point, TSH: thyroid stimulating hormone, V: volume, VMAT: volumetric modulated arc therapy, vs.: versus, w: week(s), y: year(s)
